# Supplementary material for: Mechanisms for pattern specificity of deep-brain stimulation in Parkinson’s disease
Source: PLOS journal article supplement (doi:10.1371/journal.pone.0182884), 2017-08-16
Supplement: S2 (10.1371/journal.pone.0182884.s002) [file journal.pone.0182884.s002]

---

# Mechanisms for pattern specificity of deep-brain stimulation in Parkinson's disease

Osvaldo Matías Velarde, Germán Mato, Damián Dellavale\*.

Centro Atómico Bariloche and Instituto Balseiro, Consejo Nacional de Investigaciones Científicas y Técnicas (CONICET), Comisión Nacional de Energía Atómica (CNEA), 8400 San Carlos de Bariloche, Río Negro, Argentina.

\*dellavale@cab.cnea.gov.ar

## S2 Appendix. Pole-zero cancellation mechanism.

Under conditions  $I_i > T_i (i = 1, 2)$ , the system is in the linear state (both neurons are active). The differential equations of the reduced model were Laplace transformed to obtain the following simultaneous algebraic equations,

$$\tau_i s \hat{m}_i(s) = -\hat{m}_i + G_j \hat{m}_j(s) e^{-s\Delta_j} + \hat{H}_i(s) - \frac{T_i}{s}. \quad (1)$$

In considering the two neural populations constituting our reduced model, the previous equations can be written in matrix form,

$$\begin{bmatrix} \hat{m}_1 \\ \hat{m}_2 \end{bmatrix} = \frac{1}{p(s)} \begin{bmatrix} 1 + s\mu\tau & G_2 e^{-s\Delta_2} \\ G_1 e^{-s\Delta_1} & 1 + s\tau \end{bmatrix} \begin{bmatrix} \hat{H}_1(s) - \frac{T_1}{s} \\ \hat{H}_2(s) - \frac{T_2}{s} \end{bmatrix}.$$

where  $s$  is the Laplace complex variable and  $p(s)$  is given by the Eq (3) of the main text.

It was assumed that  $H_1$  is a constant and  $H_2$  is a pulse train with period  $\frac{1}{f_{DBS}}$ , pulse time  $\delta$  and amplitude  $H_0^{DBS}$ . Therefore, their Laplace transforms are

$$\begin{aligned} \hat{H}_1(s) &= \frac{H_1}{s}, \\ \hat{H}_2(s) &= \frac{H_0^{DBS}}{s} \frac{1 - e^{-s\delta}}{1 - e^{-s/f_{DBS}}}. \end{aligned} \quad (2)$$

Also, we assumed that system have an imaginary pole  $i\omega$ , i.e. there is an imaginary root of  $p(s)$ .

Solving the equation  $\hat{m}_1(i\omega) = 0$  in  $\omega$  yields,

$$\hat{H}_2(i\omega) = -\frac{1 + i\omega\mu\tau}{G_2} e^{i\omega\Delta_2} \left( \hat{H}_1(i\omega) - \frac{T_1}{i\omega} \right) + \frac{T_2}{i\omega} \quad (3)$$

Then, using Eq (2), we find that

$$H_0^{DBS} \frac{\sin(\omega\delta/2)}{\sin(\omega/2f_{DBS})} e^{i\omega(\frac{1}{f_{DBS}} - \delta)/2} = -\frac{1 + i\omega\mu\tau}{G_2} e^{i\omega\Delta_2} (H_1 - T_1) + T_2 = z = |z| e^{i\phi(z)} \quad (4)$$

where  $z$  is a complex number that depends only on the parameters of the network.
