# Supplementary material for: Mechanisms for pattern specificity of deep-brain stimulation in Parkinson’s disease
Source: PLOS journal article supplement (doi:10.1371/journal.pone.0182884), 2017-08-16
Supplement: S3 (10.1371/journal.pone.0182884.s003) [file journal.pone.0182884.s003]

---

# Mechanisms for pattern specificity of deep-brain stimulation in Parkinson's disease

Osvaldo Matías Velarde, Germán Mato, Damián Dellavale\*.

Centro Atómico Bariloche and Instituto Balseiro, Consejo Nacional de Investigaciones Científicas y Técnicas (CONICET), Comisión Nacional de Energía Atómica (CNEA), 8400 San Carlos de Bariloche, Río Negro, Argentina.

\*dellavale@cab.cnea.gov.ar

## S3 Appendix. Frequency for activity suppression.

First, we suppose that  $H_2$  is such that  $I_1 < T_1$  at all time. Under this condition, the steady state of the system is given by  $m_1 \rightarrow 0$  in Eq (1) of the main text. On the other hand, the equation for  $m_2$  (see Eq (2) in the main text) is reduced to,

$$\tau_2 \dot{m}_2 = -m_2 + H_2(t) - T_2.$$

Then,

$$m_2(t) = e^{-\frac{t}{\tau_2}} (m_2(0) + \frac{1}{\tau_2} \int_0^t H_2(s) e^{\frac{s}{\tau_2}} ds - T_2(e^{\frac{t}{\tau_2}} - 1)),$$

where  $m_2(0)$  is a constant of integration.

Taking into account the periodicity in time, we can to determine the constant  $m_2(0)$  given by the following expression

$$m_2(0) = H_0^{DBS} \frac{e^{\frac{\delta}{\tau_2}} - 1}{e^{\frac{1}{f_{DBS}\tau_2}} - 1} - T_2.$$

Since the input  $I_1$  is lower than threshold  $T_1$ , it follows that  $I_1 = G_2 m_2(0) + H_1 < T_1$ . This condition is equivalent to determine a lower bound for the stimulation frequency  $f_{DBS}$

$$f_{DBS} > \frac{1}{\tau_2 \lg(1 + H_0^{DBS} \frac{G_2}{T_2 G_2 + T_1 - H_1} (e^{\frac{\delta}{\tau_2}} - 1))}.$$

In the limit of  $\delta$  sufficiently small,

$$f_{DBS} > f_s = \frac{1}{\tau_2 \lg(1 + \frac{H_0^{DBS} \delta}{\tau_2} k)} \sim \frac{1}{H_0^{DBS} \delta k}.$$

where  $k = \frac{G_2}{T_2 G_2 + T_1 - H_1}$ .
